# Supplementary material
Source: Springer Nature journal article supplement (https://www.springermedizin.de/resource/supplementary/12893_2014_543_MOESM1_ESM.pdf/9512456)

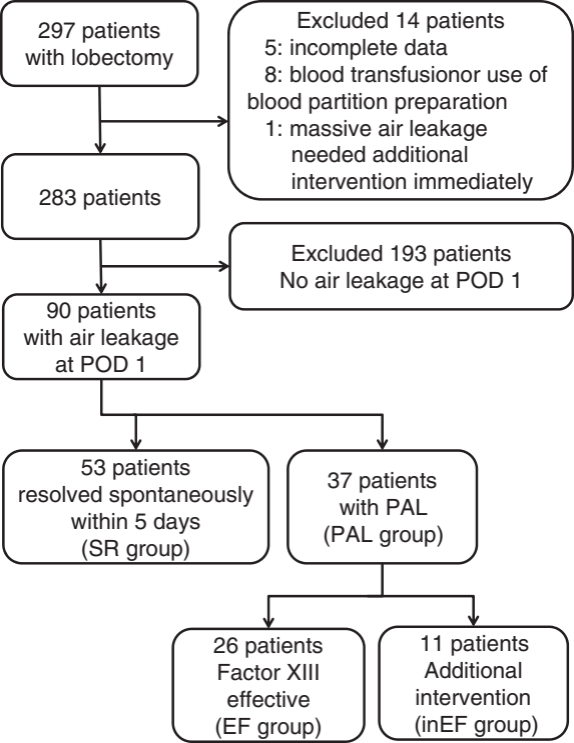

Supplement: MOESM1 [file 9512456]
